# Supplementary material for: Buffering capacity of commercially available foods is influenced by composition and initial properties in the context of gastric digestion
Source: Royal Society of Chemistry journal article supplement (doi:10.1039/c9fo03033f), 2020-01-01
Supplement: c9fo03033f1.pdf [file c9fo03033f1.pdf]

## 1. SUPPLEMENTARY MATERIAL

**Supplementary Table 1.** Refractive index and nitrogen conversion factors used for each food product (listed in alphabetical order) for particle size distribution and protein content analyses. Foods are listed in alphabetical order.

| Food Product                    | Brand        | Refractive Index   | Nitrogen Conversion Factor |
|---------------------------------|--------------|--------------------|----------------------------|
| Apple, var. <i>Granny Smith</i> | N/A          | 1.53 <sup>42</sup> | 5.72 <sup>43</sup>         |
| Beans, black with water         | Trader Joe's | 1.53 <sup>26</sup> | 5.44 <sup>43</sup>         |
| Beans, refried black            | Trader Joe's | 1.53 <sup>26</sup> | 5.44 <sup>43</sup>         |
| Beef, baby food                 | Gerber       | 1.52 <sup>44</sup> | 5.72 <sup>43</sup>         |
| Beverage, almond milk           | Trader Joe's | 1.1 <sup>45</sup>  | 5.18 <sup>46</sup>         |
| Beverage, protein shake         | Pure Protein | 1.52 <sup>47</sup> | 6.38 <sup>48</sup>         |
| Cheese, cream spread            | Trader Joe's | 1.52 <sup>47</sup> | 6.13 <sup>43</sup>         |
| Cheese, <i>queso fresco</i>     | El Mexicano  | 1.46 <sup>49</sup> | 6.13 <sup>43</sup>         |
| Chicken, canned                 | Trader Joe's | 1.46 <sup>50</sup> | 5.82 <sup>43</sup>         |
| Coffee, cold brew               | Trader Joe's | 1.53 <sup>26</sup> | 6.25 <sup>51</sup>         |
| Hummus, plain                   | Trader Joe's | 1.46 <sup>49</sup> | 5.4 <sup>52</sup>          |
| Juice, apple                    | Tropicana    | 1.53 <sup>42</sup> | 5.72 <sup>43</sup>         |
| Juice, carrot                   | Trader Joe's | 1.73 <sup>53</sup> | 6.49 <sup>54</sup>         |
| Juice, pineapple                | Trader Joe's | 1.53 <sup>55</sup> | 5.72 <sup>43</sup>         |
| Lentils, steamed                | Trader Joe's | 1.53 <sup>26</sup> | 5.4 <sup>52</sup>          |
| Milk, half and half             | Trader Joe's | 1.52 <sup>47</sup> | 6.02 <sup>43</sup>         |
| Milk, low-fat                   | Trader Joe's | 1.52 <sup>47</sup> | 6.02 <sup>43</sup>         |
| Milk, non-fat                   | Trader Joe's | 1.52 <sup>47</sup> | 6.02 <sup>43</sup>         |
| Milk, whipping cream            | Trader Joe's | 1.52 <sup>47</sup> | 6.02 <sup>43</sup>         |
| Milk, whole                     | Trader Joe's | 1.52 <sup>47</sup> | 6.02 <sup>43</sup>         |
| Peanut butter, creamy unsalted  | Trader Joe's | 1.50 <sup>56</sup> | 5.46 <sup>57</sup>         |
| Potato, boiled                  | N/A          | 1.53 <sup>26</sup> | 5.18 <sup>43</sup>         |
| Rice, brown                     | Hinode       | 1.53 <sup>58</sup> | 5.37 <sup>43</sup>         |
| Rice, white                     | Hinode       | 1.53 <sup>58</sup> | 5.37 <sup>43</sup>         |
| Tofu, organic uncooked          | Trader Joe's | 1.47 <sup>59</sup> | 5.50 <sup>60</sup>         |
| Tomato, paste                   | Hunt's       | 1.46 <sup>61</sup> | 6.26 <sup>43</sup>         |
| Tuna, canned in water           | StarKist     | 1.52 <sup>44</sup> | 5.82 <sup>43</sup>         |
| Yogurt, Greek                   | Trader Joe's | 1.52 <sup>47</sup> | 6.02 <sup>43</sup>         |
| Yogurt, non-fat Greek           | Trader Joe's | 1.52 <sup>47</sup> | 6.02 <sup>43</sup>         |
| Yogurt, plain                   | Trader Joe's | 1.52 <sup>47</sup> | 6.02 <sup>43</sup>         |

**Supplementary Table 2.** Transition sharpness and coefficient of determination ( $R^2$ ) of the empirical model (Eq. 1). Foods are listed in alphabetical order.

| <b>Food Product</b>            | <b>Transition sharpness (c)<br/>(dimensionless)</b> | <b><math>R^2</math></b> |
|--------------------------------|-----------------------------------------------------|-------------------------|
| Apple, <i>Granny Smith</i>     | 183                                                 | 1.00                    |
| Beans, black with water        | 74                                                  | 0.99                    |
| Beans, refried black           | 75                                                  | 0.99                    |
| Beef, baby food                | 61                                                  | 0.98                    |
| Beverage, almond milk          | 137                                                 | 1.00                    |
| Beverage, protein shake        | 90                                                  | 1.00                    |
| Cheese, cream spread           | 108                                                 | 0.98                    |
| Cheese, <i>queso fresco</i>    | 38                                                  | 0.99                    |
| Chicken, canned                | 28                                                  | 0.97                    |
| Coffee, cold brew              | 185                                                 | 0.99                    |
| Hummus, plain                  | 79                                                  | 0.99                    |
| Juice, apple                   | 149                                                 | 0.98                    |
| Juice, carrot                  | 124                                                 | 0.98                    |
| Juice, pineapple               | 199                                                 | 0.99                    |
| Lentils, steamed               | 64                                                  | 1.00                    |
| Milk, half and half            | 148                                                 | 1.00                    |
| Milk, low-fat                  | 132                                                 | 0.99                    |
| Milk, non-fat                  | 148                                                 | 1.00                    |
| Milk, whipping cream           | 227                                                 | 0.97                    |
| Milk, whole                    | 135                                                 | 1.00                    |
| Peanut butter, creamy unsalted | 43                                                  | 0.93                    |
| Potato, boiled                 | 66                                                  | 0.98                    |
| Rice, brown                    | 200                                                 | 0.95                    |
| Rice, white                    | 198                                                 | 0.97                    |
| Tofu, organic uncooked         | 135                                                 | 0.99                    |
| Tomato, paste                  | 48                                                  | 1.00                    |
| Tuna, canned in water          | 24                                                  | 0.98                    |
| Yogurt, Greek                  | 104                                                 | 1.00                    |
| Yogurt, non-fat Greek          | 109                                                 | 0.98                    |
| Yogurt, plain                  | 97                                                  | 1.00                    |
